# Supplementary material for: Efficient and selective conversion of lactic acid into acetaldehyde using a mesoporous aluminum phosphate catalyst
Source: Royal Society of Chemistry journal article supplement (doi:10.1039/c4gc01779j), 2014-11-21
Supplement: c4gc01779j1.pdf [file c4gc01779j1.pdf]

## Supplementary Information

### Efficient and selective conversion of lactic acid into acetaldehyde using the mesoporous aluminum phosphate catalyst

Congming Tang, Jiansheng Peng, Xinli Li, Zhanjie Zhai, Wei Bai, Ning Jiang, Hejun Gao, Yunwen Liao

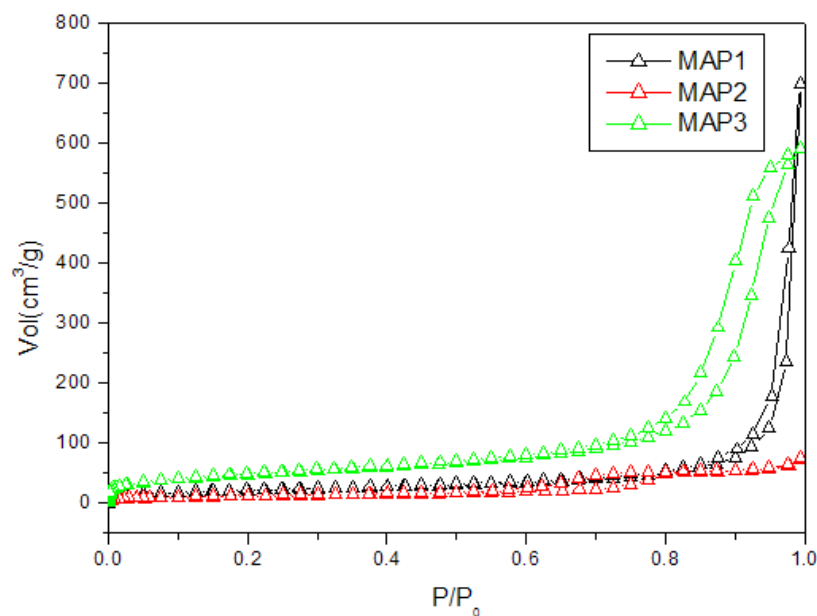

**Figure S1** N<sub>2</sub> adsorption-desorption isotherms curves of catalysts

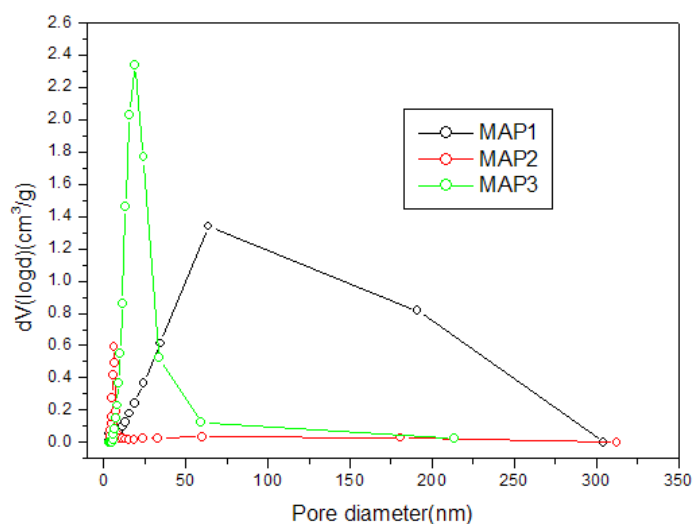

**Figure S2** Pore size distribution curves of catalysts

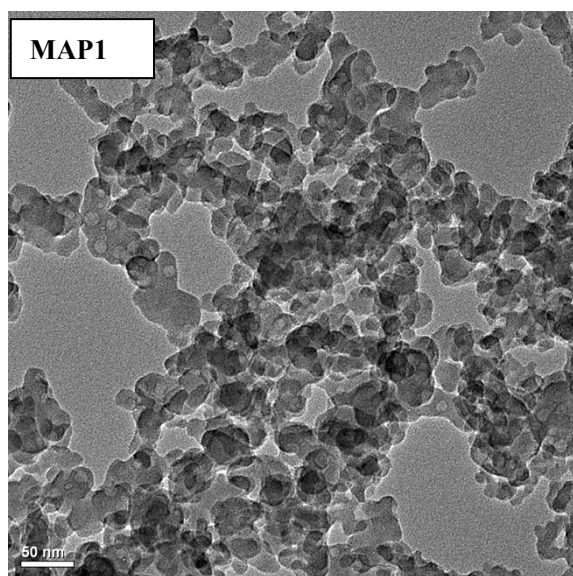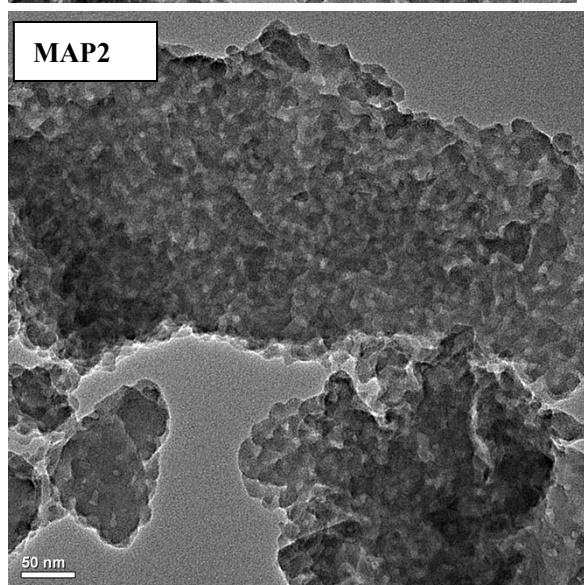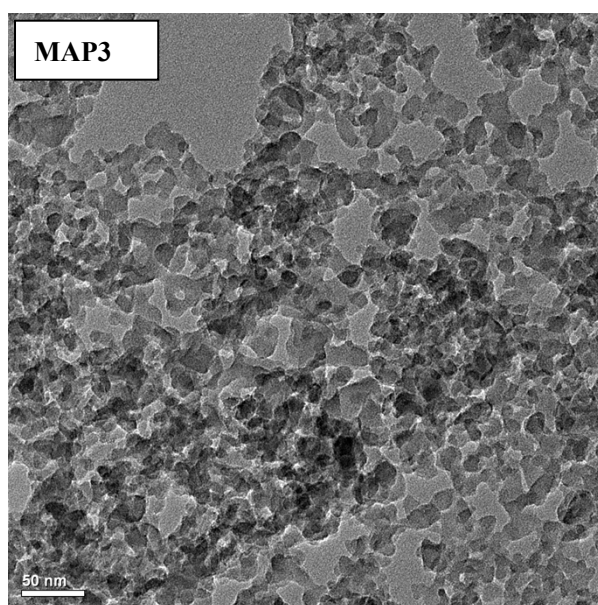

**Figure S3** TEM images of catalysts

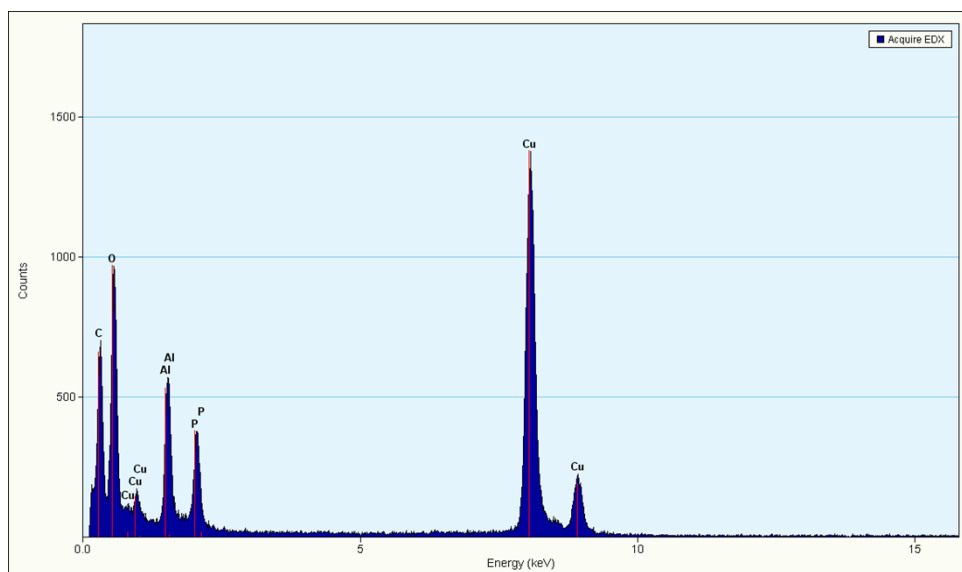

**Figure S4** Energy dispersive X-ray Spectroscopy (EDS) analysis of catalyst

**Table S1** Surface acid density data of aluminum phosphate catalysts

| Catalyst <sup>a</sup> | S <sub>BET</sub> (m <sup>2</sup> /g) | Weak-medium acid density(mmol/m <sup>2</sup> ) |
|-----------------------|--------------------------------------|------------------------------------------------|
| MAP1                  | 74.8                                 | 0.014                                          |
| MAP2                  | 40.8                                 | 0.053                                          |
| MAP3                  | 171.1                                | 0.020                                          |

**Table S2** Surface specific reaction rate over MAP2 and MAP3 catalysts at 250°C, 275°C.

| Catalyst | Reaction temperature(°C) | Area-specific catalytic rate (μmol·h <sup>-1</sup> ·m <sup>-2</sup> ) |              |
|----------|--------------------------|-----------------------------------------------------------------------|--------------|
|          |                          | LA consumption                                                        | AD formation |
| MAP2     | 250                      | 78                                                                    | 74           |
|          | 275                      | 277                                                                   | 266          |
| MAP3     | 250                      | 30                                                                    | 28           |
|          | 275                      | 88                                                                    | 84           |

a: Conditions: catalyst: MAP2, 0.1355g, MAP3, 0.1360g, particle size: 20~40 meshes, carrier gas N<sub>2</sub>: 1mL/min, feed flow rate: 1mL/h, LA(lactic acid) feedstock: 20wt% in water.
